# Supplementary material
Source: publisher figshare collection journal article supplement (https://rs.figshare.com/ndownloader/files/14606471)
Supplement: Supplementary file 1 [file 14606471]

	Seymouria	Limnoscelis	Orobates	Eothyris	Archaeovenator	Captorhinus	Rhiodenticulatus	Petrolacosaurus	Youngina	Acerosodontosaurus	Mesosaurus	Eunotosaurus	Milleretta	Australothyris	Microleter	Nyctiphruretus	Eudibamus	Belebey	Macroleter	Bradysaurus	Pareiasuchus	Scutosaurus	Procolophon	Owenetta	Barasaurus	Bashkyroleter_mesensis	Bashkyroleter_bashkyricus	Nycteroleter	Emeroleter	Rhipaeosaurus	Lanthanosuchus	Acleistorhinus	Feeserpeton	Colobomycter_pholeter	Colobomycter_vaughni	Delorhynchus	Abyssomedon	Erpetonyx	Bolosaurus	Ruhuhuaria	Sclerosaurus	Hypsognathus	Leptopleuron	Anomoiodon	45	46	47	48	49
Seymouria	0	0.511312855334557	0.53682282645947	0.537239482334715	0.510252376912122	0.572751820273425	0.577878561312425	0.604299042141241	0.692557910542669	0.727126809172779	0.626486311433508	0.678195731030306	0.635689227253085	0.611830086728625	0.675827633898682	0.796849546162277	0.822933408935807	0.740784532912594	0.807144148792506	0.824444931936162	0.83587143881097	0.81358210008923	0.878797535414769	0.824500509364825	0.78119643327229	0.813502848126925	0.813190250037907	0.729727656226966	0.764984329306597	0.693980594900994	0.812292851004169	0.795815583731772	0.796510189206582	0.798220081467507	0.722734247813416	0.768445763144106	0.84106867056793	0.661173271240812	0.729727656226966	0.835481873978228	0.828931404571146	0.870920954328976	0.850094672150183	0.758111894320109	0	0.390404162428829	0.459698865710138	0.495640149699521	0.499416220933113
Limnoscelis	0.511312855334557	0	0.425710620825407	0.523598775598299	0.505194341815193	0.567277823948433	0.580526462264193	0.587346255883318	0.708168364155356	0.68957456590974	0.58217436475006	0.61919647345347	0.63343437611316	0.622982500981283	0.647284848015653	0.777822115932637	0.839721842842193	0.726438087384824	0.792751369627871	0.807144148792506	0.816186847758417	0.828307958650396	0.872799105084295	0.828085660826699	0.785398163397448	0.727126809172779	0.749134495254634	0.682100815351151	0.728574894275179	0.697997221710601	0.747728128262345	0.748522638224634	0.797027118755104	0.792065027610783	0.718532368692478	0.794170543265356	0.813190250037907	0.638116203172301	0.681476968720775	0.684719203002283	0.881737845899824	0.838690498206084	0.864236837333889	0.748327172280567	0.511312855334557	0.346989227872205	0.217373364570968	0.509739678831507	0.494485674229891
Orobates	0.53682282645947	0.425710620825407	0	0.530969602742069	0.520735858184483	0.612693063806137	0.622135063910722	0.63666254307827	0.746898593069036	0.773201832008621	0.681197260101575	0.666297534519842	0.646522657894053	0.660576260008741	0.620908677850087	0.752040089192336	0.848949419193833	0.736935220377444	0.781398120729553	0.773769208039793	0.755465758082805	0.766013462718838	0.850094672150183	0.82389773372586	0.780810943083085	0.743179338536436	0.763002615965125	0.744813071053797	0.758503475790728	0.68957456590974	0.797304050377783	0.818756237602561	0.817064898663015	0.805951896811937	0.684719203002283	0.795202713289678	0.754127782499203	0.701674123787604	0.671512768604101	0.864677303716298	0.82389773372586	0.785398163397448	0.821142888340209	0.766875408491402	0.53682282645947	0.436982420094556	0.359899701579572	0.516164667944079	0.520735858184483
Eothyris	0.537239482334715	0.523598775598299	0.530969602742069	0	0.353741605889672	0.640522312679424	0.619892299352801	0.568095400593765	0.584949921244643	0.579639740363704	0.574030560802275	0.632219646118989	0.533275936572776	0.489145195132247	0.659058035826409	0.797027118755104	0.805403500574443	0.721118683376736	0.733581323640083	0.779225167074151	0.735314452816668	0.718937571222422	0.80921669470965	0.814826916370989	0.792247692699178	0.736022175822818	0.723839254154331	0.666637578006725	0.746898593069036	0.447832396928932	0.74588335923308	0.729727656226966	0.69744527931559	0.666637578006725	0.605041803215686	0.710114027009105	0.802642961378288	0.5064446434135	0.634991925769138	0.785398163397448	0.722734247813416	0.79189185243999	0.798220081467507	0.706119023078598	0.537239482334715	0.387596686655181	0.485725174954541	0.183604010278919	0.353741605889672
Archaeovenator	0.510252376912122	0.505194341815193	0.520735858184483	0.353741605889672	0	0.502721448278782	0.550540994832815	0.544730628960412	0.560955109120556	0.559880567744499	0.482088361065962	0.513100331532835	0.483623942648961	0.499858428669651	0.638116203172301	0.744813071053797	0.738663476666902	0.687207268492992	0.730743935988697	0.780810943083085	0.78034757245882	0.780810943083085	0.830100549361246	0.790348739333034	0.764115141230056	0.670093157754392	0.716212074704895	0.662966236294638	0.699612047356218	0.699612047356218	0.729727656226966	0.68192136938031	0.729727656226966	0.687763958518817	0.704399186111886	0.678195731030306	0.713724378944766	0.44934121948553	0.62827967096144	0.675827633898682	0.761579632085247	0.791727446353447	0.785398163397448	0.752040089192336	0.510252376912122	0.34604693088923	0.413716586601103	0.286756552211548	0.0914143583720474
Captorhinus	0.572751820273425	0.567277823948433	0.612693063806137	0.640522312679424	0.502721448278782	0	0.194388769270923	0.413918321731503	0.552421130216471	0.679967449413111	0.515065880252936	0.580698562012443	0.572751820273425	0.689058480895072	0.693980594900994	0.796347943721522	0.768541037550494	0.682736607642663	0.723597087031354	0.792342831126593	0.827432391583681	0.823365674948936	0.844153986113171	0.800785207369594	0.785398163397448	0.802642961378288	0.792440649771919	0.760387734994563	0.741653056269981	0.672188444802132	0.753461558452477	0.780134908301967	0.785398163397448	0.792065027610783	0.739880774378741	0.772576245327389	0.772576245327389	0.620908677850087	0.648784072127129	0.80921669470965	0.785398163397448	0.817334768342419	0.797210285722797	0.794489573439417	0.572751820273425	0.537426198067076	0.532861868524515	0.602794552752265	0.492074860318977
Rhiodenticulatus	0.577878561312425	0.580526462264193	0.622135063910722	0.619892299352801	0.550540994832815	0.194388769270923	0	0.428192755581941	0.565237862489648	0.634467808877101	0.538156875162034	0.607772458928329	0.598539137925991	0.712102225873288	0.701674123787604	0.806065204881696	0.715550959254757	0.648268856653133	0.754127782499203	0.785398163397448	0.819322490592156	0.80921669470965	0.817165563252651	0.789671719703543	0.789985383711812	0.834256367822001	0.839348945539978	0.805403500574443	0.774286137588315	0.690229984437248	0.76365217800239	0.812884532755504	0.791280652041493	0.833417150369847	0.733581323640083	0.80921669470965	0.799685822032095	0.640522312679424	0.615479708670387	0.735314452816668	0.703638951304735	0.791016259140762	0.780893597958103	0.775193373310361	0.577878561312425	0.535256138305424	0.560955109120556	0.619892299352801	0.538663466080787
Petrolacosaurus	0.604299042141241	0.587346255883318	0.63666254307827	0.568095400593765	0.544730628960412	0.413918321731503	0.428192755581941	0	0.467542520696797	0.607772458928329	0.539619158303679	0.668165367665155	0.554166601554124	0.598739708726271	0.652251154838357	0.773397011098747	0.725732850993635	0.634778843893034	0.754609479036479	0.847093057003784	0.886077123792614	0.882914429045646	0.835098286509096	0.742974398182001	0.728755346448314	0.798913322632588	0.844860259926088	0.785398163397448	0.779780067654135	0.743683120092141	0.68957456590974	0.739880774378741	0.735314452816668	0.711601110567932	0.704399186111886	0.71788551145606	0.679341508157834	0.6211708544323	0.603442459470354	0.693980594900994	0.827113206702756	0.761579632085247	0.827113206702756	0.734288797579491	0.604299042141241	0.57370358154443	0.577723941815074	0.523598775598299	0.534226044567914
Youngina	0.692557910542669	0.708168364155356	0.746898593069036	0.584949921244643	0.560955109120556	0.552421130216471	0.565237862489648	0.467542520696797	0	0.387596686655181	0.576224970175714	0.632542878703874	0.547162373596937	0.740894982207175	0.760798075934313	0.758667875289752	0.755259433915461	0.691089970309746	0.696698361177263	0.823313277560705	0.831682724872383	0.823313277560705	0.822746317455678	0.736138186481674	0.764731121913201	0.754514331385036	0.79309077456617	0.715728493018563	0.724019634514942	0.659058035826409	0.722734247813416	0.69987537246592	0.785398163397448	0.707620078546386	0.615479708670387	0.752664505457644	0.634467808877101	0.638116203172301	0.661173271240812	0.761579632085247	0.76266305718895	0.808133269605947	0.797796128030122	0.794832685497478	0.692557910542669	0.655141931713778	0.719994415358595	0.571627801432262	0.550429622459073
Acerosodontosaurus	0.727126809172779	0.68957456590974	0.773201832008621	0.579639740363704	0.559880567744499	0.679967449413111	0.634467808877101	0.607772458928329	0.387596686655181	0	0.661924806117232	0.595124567552538	0.49693249077922	0.523598775598299	0.481275373942343	0.752040089192336	0.799685822032095	0.771110504762802	0.727126809172779	0.80921669470965	0.90183225252649	0.871184279438678	0.689058480895072	0.703638951304735	0.721118683376736	0.719994415358595	0.665196055012819	0.701674123787604	0.696698361177263	0.633051836389749	0.647284848015653	0.65427058395952	0.708168364155356	0.65427058395952	0.739880774378741	0.662544100468216	0.633051836389749	0.570510447745185	0.684719203002283	0.684719203002283	0.615479708670387	0.659058035826409	0.679967449413111	0.659058035826409	0.727126809172779	0.640522312679424	0.699612047356218	0.579639740363704	0.559880567744499
Mesosaurus	0.626486311433508	0.58217436475006	0.681197260101575	0.574030560802275	0.482088361065962	0.515065880252936	0.538156875162034	0.539619158303679	0.576224970175714	0.661924806117232	0	0.546400564137972	0.493983960789393	0.628052059141889	0.684719203002283	0.713724378944766	0.68957456590974	0.619446696458161	0.691089970309746	0.79309077456617	0.815330568712092	0.800785207369594	0.800551998380542	0.703840399538012	0.711213239661678	0.715550959254757	0.713724378944766	0.678962334975182	0.644360000583874	0.672188444802132	0.744175007003091	0.698758345188678	0.741036186362678	0.770690159993482	0.736935220377444	0.708168364155356	0.729727656226966	0.542639102249653	0.609370613742946	0.633051836389749	0.828931404571146	0.738819192880116	0.785398163397448	0.729727656226966	0.626486311433508	0.551801771418696	0.577723941815074	0.545533844559572	0.47062071328753
Eunotosaurus	0.678195731030306	0.61919647345347	0.666297534519842	0.632219646118989	0.513100331532835	0.580698562012443	0.607772458928329	0.668165367665155	0.632542878703874	0.595124567552538	0.546400564137972	0	0.420534335283965	0.620669593588488	0.529719324674337	0.618975944081698	0.76484442998296	0.723597087031354	0.686719608622262	0.764984329306597	0.76365217800239	0.750015103298147	0.703398429239946	0.666297534519842	0.634778843893034	0.633051836389749	0.651137459010189	0.589516802045826	0.674091496491154	0.624077252536407	0.707620078546386	0.659058035826409	0.71594425292463	0.748327172280567	0.588002603547568	0.649588013878863	0.602794552752265	0.579639740363704	0.729727656226966	0.5064446434135	0.706119023078598	0.722734247813416	0.740894982207175	0.675827633898682	0.678195731030306	0.597320707515273	0.631832431701086	0.598539137925991	0.513100331532835
Milleretta	0.635689227253085	0.63343437611316	0.646522657894053	0.533275936572776	0.483623942648961	0.572751820273425	0.598539137925991	0.554166601554124	0.547162373596937	0.49693249077922	0.493983960789393	0.420534335283965	0	0.492178941714585	0.559479220049725	0.6486637431645	0.749653438454688	0.667485854023887	0.673351617246763	0.767408670942773	0.750486080905767	0.753461558452477	0.746898593069036	0.697154518060929	0.684719203002283	0.646246177510508	0.709767624024506	0.624077252536407	0.633051836389749	0.549467244757627	0.71516745604252	0.642691855941703	0.622751032798775	0.674740942223553	0.696698361177263	0.638116203172301	0.481275373942343	0.493183126726669	0.641634416492091	0.76365217800239	0.68957456590974	0.755380134174809	0.753630763542245	0.727577067139301	0.635689227253085	0.571819233406113	0.612554738339339	0.507223338642247	0.472597028377351
Australothyris	0.611830086728625	0.622982500981283	0.660576260008741	0.489145195132247	0.499858428669651	0.689058480895072	0.712102225873288	0.598739708726271	0.740894982207175	0.523598775598299	0.628052059141889	0.620669593588488	0.492178941714585	0	0.467542520696797	0.655061102092582	0.713724378944766	0.669916353040542	0.734288797579491	0.721393720255409	0.719994415358595	0.701674123787604	0.75961354049173	0.727373272021687	0.736539958972895	0.667011141500144	0.665196055012819	0.649944576869654	0.641634416492091	0.615479708670387	0.631832431701086	0.572501458875092	0.567450475278837	0.581133411957722	0.640522312679424	0.56562336717336	0.593199776149629	0.478632959524503	0.622533419750133	0.84106867056793	0.874097965617633	0.717286468210327	0.768541037550494	0.644658126782026	0.611830086728625	0.570510447745185	0.606934115453956	0.489145195132247	0.483623942648961
Microleter	0.675827633898682	0.647284848015653	0.620908677850087	0.659058035826409	0.638116203172301	0.693980594900994	0.701674123787604	0.652251154838357	0.760798075934313	0.481275373942343	0.684719203002283	0.529719324674337	0.559479220049725	0.467542520696797	0	0.559479220049725	0.649588013878863	0.668964074268407	0.711601110567932	0.718030340078631	0.724642705052608	0.726438087384824	0.645914877777429	0.555121167556787	0.472213685781505	0.678017239025013	0.673351617246763	0.633051836389749	0.659058035826409	0.647284848015653	0.645654934838247	0.6211708544323	0.588002603547568	0.586657762322532	0.532861868524515	0.575020123674014	0.420534335283965	0.513585909631033	0.653436739332555	0.615479708670387	0.752040089192336	0.632219646118989	0.638116203172301	0.555121167556787	0.675827633898682	0.63613206280501	0.615479708670387	0.675131532937032	0.638116203172301
Nyctiphruretus	0.796849546162277	0.777822115932637	0.752040089192336	0.797027118755104	0.744813071053797	0.796347943721522	0.806065204881696	0.773397011098747	0.758667875289752	0.752040089192336	0.713724378944766	0.618975944081698	0.6486637431645	0.655061102092582	0.559479220049725	0	0.705513280405774	0.672798340681942	0.556943564066663	0.633833946456146	0.667110357974677	0.661924806117232	0.510954027575901	0.491909901838393	0.484170846704953	0.558599315343563	0.527655167211147	0.561988802350395	0.576394260795717	0.586300713144127	0.733220177103221	0.633592097710771	0.638116203172301	0.729727656226966	0.666637578006725	0.627620288848268	0.277405516490036	0.661173271240812	0.693980594900994	0.378228192334186	0.599313896417285	0.51768713185845	0.504765359720943	0.48600742513232	0.796849546162277	0.766875408491402	0.764024132819094	0.820310245889129	0.735767152018223
Eudibamus	0.822933408935807	0.839721842842193	0.848949419193833	0.805403500574443	0.738663476666902	0.768541037550494	0.715550959254757	0.725732850993635	0.755259433915461	0.799685822032095	0.68957456590974	0.76484442998296	0.749653438454688	0.713724378944766	0.649588013878863	0.705513280405774	0	0.248740049959281	0.693980594900994	0.820310245889129	0.753731428131882	0.773769208039793	0.661924806117232	0.602322418614969	0.638559696099005	0.697997221710601	0.642432398786809	0.707303248367224	0.763002615965125	0.864677303716298	0.69226801160917	0.684719203002283	0.696698361177263	0.717003249935325	0.549467244757627	0.741223068763045	0.523598775598299	0.665196055012819	0.382826315621539	0.420534335283965	0.624077252536407	0.59209403498061	0.668964074268407	0.642432398786809	0.822933408935807	0.803048888025466	0.807144148792506	0.805403500574443	0.738663476666902
Belebey	0.740784532912594	0.726438087384824	0.736935220377444	0.721118683376736	0.687207268492992	0.682736607642663	0.648268856653133	0.634778843893034	0.691089970309746	0.771110504762802	0.619446696458161	0.723597087031354	0.667485854023887	0.669916353040542	0.668964074268407	0.672798340681942	0.248740049959281	0	0.639088320725322	0.78034757245882	0.754766761483421	0.731898076153128	0.704087874800386	0.635545806948538	0.659058035826409	0.731074483952703	0.702935280539462	0.692763872172872	0.706119023078598	0.785398163397448	0.755969410423908	0.727126809172779	0.689881554763663	0.692763872172872	0.647284848015653	0.720862690889136	0.563942641360629	0.633051836389749	0.334360404047854	0.536061489866503	0.668964074268407	0.651623984477925	0.675827633898682	0.661924806117232	0.740784532912594	0.696698361177263	0.693483505944198	0.721118683376736	0.687207268492992
Macroleter	0.807144148792506	0.792751369627871	0.781398120729553	0.733581323640083	0.730743935988697	0.723597087031354	0.754127782499203	0.754609479036479	0.696698361177263	0.727126809172779	0.691089970309746	0.686719608622262	0.673351617246763	0.734288797579491	0.711601110567932	0.556943564066663	0.693980594900994	0.639088320725322	0	0.508934939260157	0.53257385007175	0.52154900270314	0.597938649248959	0.579639740363704	0.600543433667733	0.389859514470721	0.358770670270572	0.412189938104705	0.377584776616373	0.420534335283965	0.600822134545315	0.604724242621963	0.638116203172301	0.710114027009105	0.696698361177263	0.686463236478584	0.69516559319944	0.674317172953673	0.659058035826409	0.549467244757627	0.517159656710324	0.626486311433508	0.583995871575592	0.595694305833586	0.807144148792506	0.824444931936162	0.8020679180281	0.74512474486397	0.72158873460176
Bradysaurus	0.824444931936162	0.807144148792506	0.773769208039793	0.779225167074151	0.780810943083085	0.792342831126593	0.785398163397448	0.847093057003784	0.823313277560705	0.80921669470965	0.79309077456617	0.764984329306597	0.767408670942773	0.721393720255409	0.718030340078631	0.633833946456146	0.820310245889129	0.78034757245882	0.508934939260157	0	0.231477363970178	0.236274529619553	0.642620600520444	0.61817603219937	0.638673299097705	0.565758482271635	0.536061489866503	0.601813775203258	0.611939714633867	0.615479708670387	0.626840007778175	0.69987537246592	0.693980594900994	0.765392826220454	0.718532368692478	0.753845694487141	0.717623239707485	0.816668544295694	0.744368525292303	0.735314452816668	0.622982500981283	0.675827633898682	0.612625576085676	0.652251154838357	0.824444931936162	0.806531215495876	0.805403500574443	0.791571159720746	0.771634957502193
Pareiasuchus	0.83587143881097	0.816186847758417	0.755465758082805	0.735314452816668	0.78034757245882	0.827432391583681	0.819322490592156	0.886077123792614	0.831682724872383	0.90183225252649	0.815330568712092	0.76365217800239	0.750486080905767	0.719994415358595	0.724642705052608	0.667110357974677	0.753731428131882	0.754766761483421	0.53257385007175	0.231477363970178	0	0.121567021870929	0.629014802426676	0.648784072127129	0.67741791405497	0.565758482271635	0.552421130216471	0.615479708670387	0.648268856653133	0.640522312679424	0.623229191077134	0.719994415358595	0.703638951304735	0.758357957590361	0.752040089192336	0.775963641297419	0.771883004162309	0.785398163397448	0.704399186111886	0.785398163397448	0.58217436475006	0.664663060990132	0.63117879149339	0.688297744913334	0.83587143881097	0.808133269605947	0.815851771416255	0.74786291785909	0.770244328414355
Scutosaurus	0.81358210008923	0.828307958650396	0.766013462718838	0.718937571222422	0.780810943083085	0.823365674948936	0.80921669470965	0.882914429045646	0.823313277560705	0.871184279438678	0.800785207369594	0.750015103298147	0.753461558452477	0.701674123787604	0.726438087384824	0.661924806117232	0.773769208039793	0.731898076153128	0.52154900270314	0.236274529619553	0.121567021870929	0	0.637413761717983	0.662966236294638	0.693210067879466	0.595470282382041	0.559479220049725	0.619892299352801	0.633051836389749	0.615479708670387	0.622982500981283	0.697314390517449	0.689302039547387	0.74588335923308	0.736935220377444	0.754944555378642	0.785398163397448	0.785398163397448	0.697646794609587	0.785398163397448	0.600351668323255	0.673951327925744	0.6211708544323	0.670350583992318	0.81358210008923	0.813190250037907	0.829455151547308	0.731074483952703	0.771634957502193
Procolophon	0.878797535414769	0.872799105084295	0.850094672150183	0.80921669470965	0.830100549361246	0.844153986113171	0.817165563252651	0.835098286509096	0.822746317455678	0.689058480895072	0.800551998380542	0.703398429239946	0.746898593069036	0.75961354049173	0.645914877777429	0.510954027575901	0.661924806117232	0.704087874800386	0.597938649248959	0.642620600520444	0.629014802426676	0.637413761717983	0	0.370920253254602	0.432920372157466	0.663504694163281	0.610419807775917	0.660733929949391	0.674490928149051	0.615479708670387	0.736935220377444	0.733220177103221	0.680228781781825	0.713724378944766	0.739880774378741	0.730667082471077	0.633051836389749	0.718532368692478	0.681476968720775	0.299334026417771	0.325136653327191	0.262439466750838	0.275642799216265	0.300684891226831	0.878797535414769	0.845828867305087	0.872616668484764	0.833089492901553	0.839072621448383
Owenetta	0.824500509364825	0.828085660826699	0.82389773372586	0.814826916370989	0.790348739333034	0.800785207369594	0.789671719703543	0.742974398182001	0.736138186481674	0.703638951304735	0.703840399538012	0.666297534519842	0.697154518060929	0.727373272021687	0.555121167556787	0.491909901838393	0.602322418614969	0.635545806948538	0.579639740363704	0.61817603219937	0.648784072127129	0.662966236294638	0.370920253254602	0	0.159451650607169	0.663504694163281	0.630771312833688	0.629014802426676	0.642141872606418	0.668964074268407	0.742793434271123	0.680462867266079	0.707303248367224	0.722734247813416	0.615479708670387	0.68654106651929	0.498480437137433	0.66608729774058	0.678525634291574	0.299334026417771	0.463647609000806	0.320096739563226	0.420534335283965	0.371938311296452	0.824500509364825	0.816186847758417	0.837215003154813	0.814826916370989	0.800251833241275
Barasaurus	0.78119643327229	0.785398163397448	0.780810943083085	0.792247692699178	0.764115141230056	0.785398163397448	0.789985383711812	0.728755346448314	0.764731121913201	0.721118683376736	0.711213239661678	0.634778843893034	0.684719203002283	0.736539958972895	0.472213685781505	0.484170846704953	0.638559696099005	0.659058035826409	0.600543433667733	0.638673299097705	0.67741791405497	0.693210067879466	0.432920372157466	0.159451650607169	0	0.671071212567907	0.688297744913334	0.641634416492091	0.611456289828471	0.605891118839246	0.757911794039392	0.691829732121533	0.687368745363946	0.726438087384824	0.579639740363704	0.709347692554057	0.447832396928932	0.65427058395952	0.694738276196703	0.306277369169669	0.487616242715106	0.399325060228488	0.443604133811227	0.433537909355837	0.78119643327229	0.764731121913201	0.766875408491402	0.778548634095718	0.774759062713458
Bashkyroleter_mesensis	0.813502848126925	0.727126809172779	0.743179338536436	0.736022175822818	0.670093157754392	0.802642961378288	0.834256367822001	0.798913322632588	0.754514331385036	0.719994415358595	0.715550959254757	0.633051836389749	0.646246177510508	0.667011141500144	0.678017239025013	0.558599315343563	0.697997221710601	0.731074483952703	0.389859514470721	0.565758482271635	0.565758482271635	0.595470282382041	0.663504694163281	0.663504694163281	0.671071212567907	0	0.290771149758077	0.261157410903024	0.268590198295948	0.261157410903024	0.610997185344961	0.561988802350395	0.647284848015653	0.715728493018563	0.718532368692478	0.615479708670387	0.593199776149629	0.638116203172301	0.765392826220454	0.555121167556787	0.684719203002283	0.657335940773247	0.65574493526106	0.668964074268407	0.813502848126925	0.76266305718895	0.717286468210327	0.721846907601064	0.670093157754392
Bashkyroleter_bashkyricus	0.813190250037907	0.749134495254634	0.763002615965125	0.723839254154331	0.716212074704895	0.792440649771919	0.839348945539978	0.844860259926088	0.79309077456617	0.665196055012819	0.713724378944766	0.651137459010189	0.709767624024506	0.665196055012819	0.673351617246763	0.527655167211147	0.642432398786809	0.702935280539462	0.358770670270572	0.536061489866503	0.552421130216471	0.559479220049725	0.610419807775917	0.630771312833688	0.688297744913334	0.290771149758077	0	0.246837857925519	0.308701537423697	0.37379217483451	0.638116203172301	0.598539137925991	0.650431765480747	0.713724378944766	0.729727656226966	0.620450679353276	0.668964074268407	0.602794552752265	0.724270393877557	0.5064446434135	0.615479708670387	0.574260996577278	0.593199776149629	0.563942641360629	0.813190250037907	0.792440649771919	0.731447381254918	0.723839254154331	0.716212074704895
Nycteroleter	0.729727656226966	0.682100815351151	0.744813071053797	0.666637578006725	0.662966236294638	0.760387734994563	0.805403500574443	0.785398163397448	0.715728493018563	0.701674123787604	0.678962334975182	0.589516802045826	0.624077252536407	0.649944576869654	0.633051836389749	0.561988802350395	0.707303248367224	0.692763872172872	0.412189938104705	0.601813775203258	0.615479708670387	0.619892299352801	0.660733929949391	0.629014802426676	0.641634416492091	0.261157410903024	0.246837857925519	0	0.312630133258513	0.350105777767146	0.584373896848447	0.527655167211147	0.630771312833688	0.678525634291574	0.684719203002283	0.565917220592568	0.558989866024985	0.593199776149629	0.708168364155356	0.509739678831507	0.785398163397448	0.678525634291574	0.664505388082235	0.642432398786809	0.729727656226966	0.684719203002283	0.673351617246763	0.666637578006725	0.647284848015653
Emeroleter	0.764984329306597	0.728574894275179	0.758503475790728	0.746898593069036	0.699612047356218	0.741653056269981	0.774286137588315	0.779780067654135	0.724019634514942	0.696698361177263	0.644360000583874	0.674091496491154	0.633051836389749	0.641634416492091	0.659058035826409	0.576394260795717	0.763002615965125	0.706119023078598	0.377584776616373	0.611939714633867	0.648268856653133	0.633051836389749	0.674490928149051	0.642141872606418	0.611456289828471	0.268590198295948	0.308701537423697	0.312630133258513	0	0.420534335283965	0.640522312679424	0.568515796032749	0.625995223288672	0.678017239025013	0.704399186111886	0.611161435432621	0.585685543457151	0.570510447745185	0.719166911668644	0.538663466080787	0.615479708670387	0.68192136938031	0.63128407775347	0.594521032025033	0.764984329306597	0.740784532912594	0.700724359219583	0.746898593069036	0.687207268492992
Rhipaeosaurus	0.693980594900994	0.697997221710601	0.68957456590974	0.447832396928932	0.699612047356218	0.672188444802132	0.690229984437248	0.743683120092141	0.659058035826409	0.633051836389749	0.672188444802132	0.624077252536407	0.549467244757627	0.615479708670387	0.647284848015653	0.586300713144127	0.864677303716298	0.785398163397448	0.420534335283965	0.615479708670387	0.640522312679424	0.615479708670387	0.615479708670387	0.668964074268407	0.605891118839246	0.261157410903024	0.37379217483451	0.350105777767146	0.420534335283965	0	0.818756237602561	0.615479708670387	0.490882678289311	0.785398163397448	0.785398163397448	0.69226801160917	0.869122203007293	0.802642961378288	0.729727656226966	1.5707963267949	0.545533844559572	0.665196055012819	0.537239482334715	0.5064446434135	0.693980594900994	0.637413761717983	0.684719203002283	0.523598775598299	0.674740942223553
Lanthanosuchus	0.812292851004169	0.747728128262345	0.797304050377783	0.74588335923308	0.729727656226966	0.753461558452477	0.76365217800239	0.68957456590974	0.722734247813416	0.647284848015653	0.744175007003091	0.707620078546386	0.71516745604252	0.631832431701086	0.645654934838247	0.733220177103221	0.69226801160917	0.755969410423908	0.600822134545315	0.626840007778175	0.623229191077134	0.622982500981283	0.736935220377444	0.742793434271123	0.757911794039392	0.610997185344961	0.638116203172301	0.584373896848447	0.640522312679424	0.818756237602561	0	0.469002549123992	0.584949921244643	0.615479708670387	0.663504694163281	0.627217193397573	0.733581323640083	0.678525634291574	0.748327172280567	0.811726117528233	0.755969410423908	0.74786291785909	0.732357563285628	0.798913322632588	0.812292851004169	0.785398163397448	0.767321936893889	0.74588335923308	0.715728493018563
Acleistorhinus	0.795815583731772	0.748522638224634	0.818756237602561	0.729727656226966	0.68192136938031	0.780134908301967	0.812884532755504	0.739880774378741	0.69987537246592	0.65427058395952	0.698758345188678	0.659058035826409	0.642691855941703	0.572501458875092	0.6211708544323	0.633592097710771	0.684719203002283	0.727126809172779	0.604724242621963	0.69987537246592	0.719994415358595	0.697314390517449	0.733220177103221	0.680462867266079	0.691829732121533	0.561988802350395	0.598539137925991	0.527655167211147	0.568515796032749	0.615479708670387	0.469002549123992	0	0.43785649906178	0.511972688049476	0.447832396928932	0.455533356978361	0.542639102249653	0.615479708670387	0.77630675335548	0.735314452816668	0.857071947850131	0.731074483952703	0.740894982207175	0.744813071053797	0.795815583731772	0.764558797186159	0.757293478667972	0.742134320704633	0.66788082331569
Feeserpeton	0.796510189206582	0.797027118755104	0.817064898663015	0.69744527931559	0.729727656226966	0.785398163397448	0.791280652041493	0.735314452816668	0.785398163397448	0.708168364155356	0.741036186362678	0.71594425292463	0.622751032798775	0.567450475278837	0.588002603547568	0.638116203172301	0.696698361177263	0.689881554763663	0.638116203172301	0.693980594900994	0.703638951304735	0.689302039547387	0.680228781781825	0.707303248367224	0.687368745363946	0.647284848015653	0.650431765480747	0.630771312833688	0.625995223288672	0.490882678289311	0.584949921244643	0.43785649906178	0	0.453292477481619	0.486694955074773	0.480296742087593	0.579639740363704	0.647284848015653	0.753461558452477	0.785398163397448	0.785398163397448	0.65086950648339	0.662204267692794	0.662544100468216	0.796510189206582	0.802642961378288	0.798220081467507	0.722734247813416	0.715728493018563
Colobomycter_pholeter	0.798220081467507	0.792065027610783	0.805951896811937	0.666637578006725	0.687763958518817	0.792065027610783	0.833417150369847	0.711601110567932	0.707620078546386	0.65427058395952	0.770690159993482	0.748327172280567	0.674740942223553	0.581133411957722	0.586657762322532	0.729727656226966	0.717003249935325	0.692763872172872	0.710114027009105	0.765392826220454	0.758357957590361	0.74588335923308	0.713724378944766	0.722734247813416	0.726438087384824	0.715728493018563	0.713724378944766	0.678525634291574	0.678017239025013	0.785398163397448	0.615479708670387	0.511972688049476	0.453292477481619	0	0.306277369169669	0.498890216483383	0.640522312679424	0.523598775598299	0.716553387245334	0.905600271782078	0.684719203002283	0.739880774378741	0.734586110971738	0.701674123787604	0.798220081467507	0.772238749501225	0.799288839029346	0.666637578006725	0.687763958518817
Colobomycter_vaughni	0.722734247813416	0.718532368692478	0.684719203002283	0.605041803215686	0.704399186111886	0.739880774378741	0.733581323640083	0.704399186111886	0.615479708670387	0.739880774378741	0.736935220377444	0.588002603547568	0.696698361177263	0.640522312679424	0.532861868524515	0.666637578006725	0.549467244757627	0.647284848015653	0.696698361177263	0.718532368692478	0.752040089192336	0.736935220377444	0.739880774378741	0.615479708670387	0.579639740363704	0.718532368692478	0.729727656226966	0.684719203002283	0.704399186111886	0.785398163397448	0.663504694163281	0.447832396928932	0.486694955074773	0.306277369169669	0	0.666637578006725	0.665196055012819	0.82389773372586	0.684719203002283	0.811726117528233	0.90183225252649	0.769266332563325	0.770244328414355	0.665196055012819	0.722734247813416	0.736935220377444	0.698758345188678	0.63613206280501	0.704399186111886
Delorhynchus	0.768445763144106	0.794170543265356	0.795202713289678	0.710114027009105	0.678195731030306	0.772576245327389	0.80921669470965	0.71788551145606	0.752664505457644	0.662544100468216	0.708168364155356	0.649588013878863	0.638116203172301	0.56562336717336	0.575020123674014	0.627620288848268	0.741223068763045	0.720862690889136	0.686463236478584	0.753845694487141	0.775963641297419	0.754944555378642	0.730667082471077	0.68654106651929	0.709347692554057	0.615479708670387	0.620450679353276	0.565917220592568	0.611161435432621	0.69226801160917	0.627217193397573	0.455533356978361	0.480296742087593	0.498890216483383	0.666637578006725	0	0.555121167556787	0.503213103063515	0.754127782499203	0.739880774378741	0.818756237602561	0.713724378944766	0.724500047773289	0.732105828588812	0.768445763144106	0.746227674008969	0.760635566669602	0.722734247813416	0.678195731030306
Abyssomedon	0.84106867056793	0.813190250037907	0.754127782499203	0.802642961378288	0.713724378944766	0.772576245327389	0.799685822032095	0.679341508157834	0.634467808877101	0.633051836389749	0.729727656226966	0.602794552752265	0.481275373942343	0.593199776149629	0.420534335283965	0.277405516490036	0.523598775598299	0.563942641360629	0.69516559319944	0.717623239707485	0.771883004162309	0.785398163397448	0.633051836389749	0.498480437137433	0.447832396928932	0.593199776149629	0.668964074268407	0.558989866024985	0.585685543457151	0.869122203007293	0.733581323640083	0.542639102249653	0.579639740363704	0.640522312679424	0.665196055012819	0.555121167556787	0	0.420534335283965	0.615479708670387	0.37379217483451	0.755969410423908	0.605041803215686	0.615479708670387	0.538663466080787	0.84106867056793	0.744813071053797	0.736935220377444	0.837215003154813	0.713724378944766
Erpetonyx	0.661173271240812	0.638116203172301	0.701674123787604	0.5064446434135	0.44934121948553	0.620908677850087	0.640522312679424	0.6211708544323	0.638116203172301	0.570510447745185	0.542639102249653	0.579639740363704	0.493183126726669	0.478632959524503	0.513585909631033	0.661173271240812	0.665196055012819	0.633051836389749	0.674317172953673	0.816668544295694	0.785398163397448	0.785398163397448	0.718532368692478	0.66608729774058	0.65427058395952	0.638116203172301	0.602794552752265	0.593199776149629	0.570510447745185	0.802642961378288	0.678525634291574	0.615479708670387	0.647284848015653	0.523598775598299	0.82389773372586	0.503213103063515	0.420534335283965	0	0.513585909631033	0.339836909454122	0.663504694163281	0.625546089066075	0.661492353966923	0.671512768604101	0.661173271240812	0.586657762322532	0.633051836389749	0.470960700649922	0.44934121948553
Bolosaurus	0.729727656226966	0.681476968720775	0.671512768604101	0.634991925769138	0.62827967096144	0.648784072127129	0.615479708670387	0.603442459470354	0.661173271240812	0.684719203002283	0.609370613742946	0.729727656226966	0.641634416492091	0.622533419750133	0.653436739332555	0.693980594900994	0.382826315621539	0.334360404047854	0.659058035826409	0.744368525292303	0.704399186111886	0.697646794609587	0.681476968720775	0.678525634291574	0.694738276196703	0.765392826220454	0.724270393877557	0.708168364155356	0.719166911668644	0.729727656226966	0.748327172280567	0.77630675335548	0.753461558452477	0.716553387245334	0.684719203002283	0.754127782499203	0.615479708670387	0.513585909631033	0	0.584373896848447	0.713724378944766	0.66608729774058	0.648784072127129	0.624753868765043	0.729727656226966	0.665196055012819	0.671512768604101	0.634991925769138	0.62827967096144
Ruhuhuaria	0.835481873978228	0.684719203002283	0.864677303716298	0.785398163397448	0.675827633898682	0.80921669470965	0.735314452816668	0.693980594900994	0.761579632085247	0.684719203002283	0.633051836389749	0.5064446434135	0.76365217800239	0.84106867056793	0.615479708670387	0.378228192334186	0.420534335283965	0.536061489866503	0.549467244757627	0.735314452816668	0.785398163397448	0.785398163397448	0.299334026417771	0.299334026417771	0.306277369169669	0.555121167556787	0.5064446434135	0.509739678831507	0.538663466080787	1.5707963267949	0.811726117528233	0.735314452816668	0.785398163397448	0.905600271782078	0.811726117528233	0.739880774378741	0.37379217483451	0.339836909454122	0.584373896848447	0	0.523598775598299	0.219987977395459	0.299334026417771	0.270549762978573	0.835481873978228	0.735314452816668	0.706119023078598	0.785398163397448	0.675827633898682
Sclerosaurus	0.828931404571146	0.881737845899824	0.82389773372586	0.722734247813416	0.761579632085247	0.785398163397448	0.703638951304735	0.827113206702756	0.76266305718895	0.615479708670387	0.828931404571146	0.706119023078598	0.68957456590974	0.874097965617633	0.752040089192336	0.599313896417285	0.624077252536407	0.668964074268407	0.517159656710324	0.622982500981283	0.58217436475006	0.600351668323255	0.325136653327191	0.463647609000806	0.487616242715106	0.684719203002283	0.615479708670387	0.785398163397448	0.615479708670387	0.545533844559572	0.755969410423908	0.857071947850131	0.785398163397448	0.684719203002283	0.90183225252649	0.818756237602561	0.755969410423908	0.663504694163281	0.713724378944766	0.523598775598299	0	0.292842771728575	0.270549762978573	0.361367123906708	0.828931404571146	0.774759062713458	0.82389773372586	0.722734247813416	0.761579632085247
Hypsognathus	0.870920954328976	0.838690498206084	0.785398163397448	0.79189185243999	0.791727446353447	0.817334768342419	0.791016259140762	0.761579632085247	0.808133269605947	0.659058035826409	0.738819192880116	0.722734247813416	0.755380134174809	0.717286468210327	0.632219646118989	0.51768713185845	0.59209403498061	0.651623984477925	0.626486311433508	0.675827633898682	0.664663060990132	0.673951327925744	0.262439466750838	0.320096739563226	0.399325060228488	0.657335940773247	0.574260996577278	0.678525634291574	0.68192136938031	0.665196055012819	0.74786291785909	0.731074483952703	0.65086950648339	0.739880774378741	0.769266332563325	0.713724378944766	0.605041803215686	0.625546089066075	0.66608729774058	0.219987977395459	0.292842771728575	0	0.177710600845112	0.302745951623004	0.870920954328976	0.811726117528233	0.82761698825846	0.804883614697414	0.804390071667092
Leptopleuron	0.850094672150183	0.864236837333889	0.821142888340209	0.798220081467507	0.785398163397448	0.797210285722797	0.780893597958103	0.827113206702756	0.797796128030122	0.679967449413111	0.785398163397448	0.740894982207175	0.753630763542245	0.768541037550494	0.638116203172301	0.504765359720943	0.668964074268407	0.675827633898682	0.583995871575592	0.612625576085676	0.63117879149339	0.6211708544323	0.275642799216265	0.420534335283965	0.443604133811227	0.65574493526106	0.593199776149629	0.664505388082235	0.63128407775347	0.537239482334715	0.732357563285628	0.740894982207175	0.662204267692794	0.734586110971738	0.770244328414355	0.724500047773289	0.615479708670387	0.661492353966923	0.648784072127129	0.299334026417771	0.270549762978573	0.177710600845112	0	0.190125603346467	0.850094672150183	0.805728968565243	0.8400523908062	0.811050441029548	0.795202713289678
Anomoiodon	0.758111894320109	0.748327172280567	0.766875408491402	0.706119023078598	0.752040089192336	0.794489573439417	0.775193373310361	0.734288797579491	0.794832685497478	0.659058035826409	0.729727656226966	0.675827633898682	0.727577067139301	0.644658126782026	0.555121167556787	0.48600742513232	0.642432398786809	0.661924806117232	0.595694305833586	0.652251154838357	0.688297744913334	0.670350583992318	0.300684891226831	0.371938311296452	0.433537909355837	0.668964074268407	0.563942641360629	0.642432398786809	0.594521032025033	0.5064446434135	0.798913322632588	0.744813071053797	0.662544100468216	0.701674123787604	0.665196055012819	0.732105828588812	0.538663466080787	0.671512768604101	0.624753868765043	0.270549762978573	0.361367123906708	0.302745951623004	0.190125603346467	0	0.758111894320109	0.739880774378741	0.757081141626205	0.732668900697789	0.752040089192336
45	0	0.511312855334557	0.53682282645947	0.537239482334715	0.510252376912122	0.572751820273425	0.577878561312425	0.604299042141241	0.692557910542669	0.727126809172779	0.626486311433508	0.678195731030306	0.635689227253085	0.611830086728625	0.675827633898682	0.796849546162277	0.822933408935807	0.740784532912594	0.807144148792506	0.824444931936162	0.83587143881097	0.81358210008923	0.878797535414769	0.824500509364825	0.78119643327229	0.813502848126925	0.813190250037907	0.729727656226966	0.764984329306597	0.693980594900994	0.812292851004169	0.795815583731772	0.796510189206582	0.798220081467507	0.722734247813416	0.768445763144106	0.84106867056793	0.661173271240812	0.729727656226966	0.835481873978228	0.828931404571146	0.870920954328976	0.850094672150183	0.758111894320109	0	0.390404162428829	0.459698865710138	0.495640149699521	0.499416220933113
46	0.390404162428829	0.346989227872205	0.436982420094556	0.387596686655181	0.34604693088923	0.537426198067076	0.535256138305424	0.57370358154443	0.655141931713778	0.640522312679424	0.551801771418696	0.597320707515273	0.571819233406113	0.570510447745185	0.63613206280501	0.766875408491402	0.803048888025466	0.696698361177263	0.824444931936162	0.806531215495876	0.808133269605947	0.813190250037907	0.845828867305087	0.816186847758417	0.764731121913201	0.76266305718895	0.792440649771919	0.684719203002283	0.740784532912594	0.637413761717983	0.785398163397448	0.764558797186159	0.802642961378288	0.772238749501225	0.736935220377444	0.746227674008969	0.744813071053797	0.586657762322532	0.665196055012819	0.735314452816668	0.774759062713458	0.811726117528233	0.805728968565243	0.739880774378741	0.390404162428829	0	0.251677666819774	0.333473172251832	0.331937385638164
47	0.459698865710138	0.217373364570968	0.359899701579572	0.485725174954541	0.413716586601103	0.532861868524515	0.560955109120556	0.577723941815074	0.719994415358595	0.699612047356218	0.577723941815074	0.631832431701086	0.612554738339339	0.606934115453956	0.615479708670387	0.764024132819094	0.807144148792506	0.693483505944198	0.8020679180281	0.805403500574443	0.815851771416255	0.829455151547308	0.872616668484764	0.837215003154813	0.766875408491402	0.717286468210327	0.731447381254918	0.673351617246763	0.700724359219583	0.684719203002283	0.767321936893889	0.757293478667972	0.798220081467507	0.799288839029346	0.698758345188678	0.760635566669602	0.736935220377444	0.633051836389749	0.671512768604101	0.706119023078598	0.82389773372586	0.82761698825846	0.8400523908062	0.757081141626205	0.459698865710138	0.251677666819774	0	0.437481249718776	0.413716586601103
48	0.495640149699521	0.509739678831507	0.516164667944079	0.183604010278919	0.286756552211548	0.602794552752265	0.619892299352801	0.523598775598299	0.571627801432262	0.579639740363704	0.545533844559572	0.598539137925991	0.507223338642247	0.489145195132247	0.675131532937032	0.820310245889129	0.805403500574443	0.721118683376736	0.74512474486397	0.791571159720746	0.74786291785909	0.731074483952703	0.833089492901553	0.814826916370989	0.778548634095718	0.721846907601064	0.723839254154331	0.666637578006725	0.746898593069036	0.523598775598299	0.74588335923308	0.742134320704633	0.722734247813416	0.666637578006725	0.63613206280501	0.722734247813416	0.837215003154813	0.470960700649922	0.634991925769138	0.785398163397448	0.722734247813416	0.804883614697414	0.811050441029548	0.732668900697789	0.495640149699521	0.333473172251832	0.437481249718776	0	0.286756552211548
49	0.499416220933113	0.494485674229891	0.520735858184483	0.353741605889672	0.0914143583720474	0.492074860318977	0.538663466080787	0.534226044567914	0.550429622459073	0.559880567744499	0.47062071328753	0.513100331532835	0.472597028377351	0.483623942648961	0.638116203172301	0.735767152018223	0.738663476666902	0.687207268492992	0.72158873460176	0.771634957502193	0.770244328414355	0.771634957502193	0.839072621448383	0.800251833241275	0.774759062713458	0.670093157754392	0.716212074704895	0.647284848015653	0.687207268492992	0.674740942223553	0.715728493018563	0.66788082331569	0.715728493018563	0.687763958518817	0.704399186111886	0.678195731030306	0.713724378944766	0.44934121948553	0.62827967096144	0.675827633898682	0.761579632085247	0.804390071667092	0.795202713289678	0.752040089192336	0.499416220933113	0.331937385638164	0.413716586601103	0.286756552211548	0
50	0.56927096054828	0.52556033557788	0.557936222011119	0.420534335283965	0.244978663126864	0.429069849388335	0.465510681676958	0.451206297872162	0.54733863294155	0.637413761717983	0.389063013338192	0.515466540493094	0.468563772387333	0.515149140077656	0.635264989529311	0.712728803725285	0.693483505944198	0.612232348422086	0.692763872172872	0.761579632085247	0.781694425822733	0.768616489330319	0.811726117528233	0.737881416701018	0.70233952493527	0.702602719507106	0.709767624024506	0.674740942223553	0.665196055012819	0.63613206280501	0.710865013613529	0.639088320725322	0.661690940663615	0.669916353040542	0.684719203002283	0.640522312679424	0.640522312679424	0.49693249077922	0.594205636004995	0.630771312833688	0.745355373380619	0.75071689520985	0.763002615965125	0.739880774378741	0.56927096054828	0.43814903058417	0.46558278963876	0.37379217483451	0.226475427259606
51	0.571819233406113	0.556006741317373	0.607036164051451	0.550681518193389	0.436286926716168	0.273292392793224	0.321750554396642	0.301595702804835	0.485049786929483	0.607233119633162	0.470960700649922	0.615479708670387	0.542096660296346	0.642141872606418	0.675131532937032	0.770470572789133	0.715402319520212	0.62615397623891	0.710651985054635	0.81358210008923	0.852528799359837	0.845828867305087	0.817334768342419	0.765708035165073	0.736138186481674	0.797304050377783	0.829573258031852	0.752907770629446	0.735314452816668	0.651137459010189	0.74186492222375	0.753461558452477	0.768153365416609	0.76484442998296	0.722734247813416	0.731723705346514	0.690229984437248	0.5712153729061	0.563942641360629	0.665196055012819	0.785398163397448	0.774286137588315	0.761579632085247	0.758111894320109	0.571819233406113	0.494637536207823	0.514235512010024	0.509739678831507	0.424513195909877
52	0.569030896263964	0.562656376431115	0.622135063910722	0.619892299352801	0.50205334130968	0.0864946513179321	0.17364501158219	0.392847714287742	0.546954288503865	0.634467808877101	0.518691997503025	0.607772458928329	0.598539137925991	0.689302039547387	0.718532368692478	0.806065204881696	0.741036186362678	0.648268856653133	0.722734247813416	0.777333297569303	0.827821928612895	0.817165563252651	0.833089492901553	0.789671719703543	0.789985383711812	0.797594494786276	0.79309077456617	0.752040089192336	0.729727656226966	0.662544100468216	0.752766307584502	0.779903547312352	0.779515674753404	0.805951896811937	0.768153365416609	0.780636186646139	0.771110504762802	0.621779298217878	0.615479708670387	0.735314452816668	0.727126809172779	0.791016259140762	0.780893597958103	0.754766761483421	0.569030896263964	0.51652882515872	0.518134729105572	0.593199776149629	0.489474713791447
53	0.585174396904325	0.575935108411801	0.638431219750809	0.566106370982696	0.488205263396917	0.374563643941421	0.391294115625572	0.174969045665689	0.427479133284893	0.584373896848447	0.523598775598299	0.651137459010189	0.558702615927304	0.624402751631484	0.69226801160917	0.747546894227478	0.702743746728771	0.598739708726271	0.744368525292303	0.834658140313222	0.869122203007293	0.872616668484764	0.830173430932378	0.72670490278238	0.72670490278238	0.778151532890489	0.821142888340209	0.75311767873871	0.785398163397448	0.722734247813416	0.717286468210327	0.743179338536436	0.732668900697789	0.720701654644714	0.704399186111886	0.727373272021687	0.673351617246763	0.603442459470354	0.595694305833586	0.665196055012819	0.817334768342419	0.74786291785909	0.794327209414289	0.722734247813416	0.585174396904325	0.53316898713458	0.553347678572319	0.519635210149275	0.476033818061323
54	0.690229984437248	0.673351617246763	0.729727656226966	0.557598826699537	0.5064446434135	0.588002603547568	0.595124567552538	0.509739678831507	0	0.387596686655181	0.668964074268407	0.615479708670387	0.538663466080787	0.652251154838357	0.584373896848447	0.659058035826409	0.830915552416156	0.754127782499203	0.633051836389749	0.744813071053797	0.874097965617633	0.813190250037907	0.674740942223553	0.624753868765043	0.662544100468216	0.761579632085247	0.706119023078598	0.713724378944766	0.638116203172301	0.573203309100855	0.693980594900994	0.675827633898682	0.713724378944766	0.675827633898682	0.563942641360629	0.722734247813416	0.652251154838357	0.675827633898682	0.663504694163281	0.706119023078598	0.701674123787604	0.69226801160917	0.642432398786809	0.584373896848447	0.690229984437248	0.644658126782026	0.701674123787604	0.557598826699537	0.5064446434135
55	0.584742944900528	0.539126617675375	0.627620288848268	0.516164667944079	0.370111809254808	0.488914929911339	0.518691997503025	0.493017728980757	0.53257385007175	0.591700642869322	0.271545775006985	0.511972688049476	0.425710620825407	0.563942641360629	0.615479708670387	0.673351617246763	0.652900498014028	0.558599315343563	0.642849943271075	0.777705552228726	0.781124607091354	0.777705552228726	0.785398163397448	0.677730402235898	0.666900703663181	0.689881554763663	0.713724378944766	0.664505388082235	0.644360000583874	0.651137459010189	0.684719203002283	0.627620288848268	0.676955036336872	0.696698361177263	0.704399186111886	0.659058035826409	0.673351617246763	0.442471681088093	0.5720898217061	0.579639740363704	0.76365217800239	0.727126809172779	0.759963466462426	0.729727656226966	0.584742944900528	0.508030957992373	0.518519316150216	0.485725174954541	0.356036232395317
56	0.597938649248959	0.569534799661441	0.634688941516357	0.533275936572776	0.430173859120838	0.499858428669651	0.523598775598299	0.508496467160393	0.544276339412492	0.567450475278837	0.407019676574921	0.38376627003729	0.283852460544074	0.480429838561219	0.511312855334557	0.640522312679424	0.666297534519842	0.605623800218161	0.648561294538207	0.757214226705667	0.754609479036479	0.750647972271483	0.757987174797741	0.686265112681906	0.661173271240812	0.634778843893034	0.68192136938031	0.611161435432621	0.6223284539378	0.570510447745185	0.670528979999224	0.588002603547568	0.600822134545315	0.636882447683439	0.605041803215686	0.612625576085676	0.563942641360629	0.438575583354633	0.625995223288672	0.675827633898682	0.739880774378741	0.725253222200054	0.73845422584369	0.708168364155356	0.597938649248959	0.52160561368914	0.551112029635411	0.507223338642247	0.418586530016836
57	0.657638838659042	0.588002603547568	0.611314073822463	0.563942641360629	0.417696651948194	0.586300713144127	0.603643965191134	0.588888801606414	0.563942641360629	0.5064446434135	0.47667961158977	0.37952497301396	0.172350589899323	0.523598775598299	0.553800782592772	0.60824557891021	0.696698361177263	0.644658126782026	0.672188444802132	0.79066141849293	0.768911659669037	0.754127782499203	0.716761751651845	0.68239850277138	0.677828704285389	0.597686359406929	0.651137459010189	0.589516802045826	0.634467808877101	0.515760957238309	0.699258401533438	0.664505388082235	0.620908677850087	0.69226801160917	0.668964074268407	0.611161435432621	0.523598775598299	0.479421085553306	0.65427058395952	0.696698361177263	0.644658126782026	0.706951727887218	0.728456981170807	0.697997221710601	0.657638838659042	0.557119751370495	0.594011798764924	0.528168925616855	0.417696651948194
58	0.634251710926165	0.649399060019036	0.667646045037048	0.558141896205864	0.438383479947663	0.579639740363704	0.606829569812463	0.550264280854463	0.61817603219937	0.567450475278837	0.490882678289311	0.488205263396917	0.415542928731344	0.357147277316123	0.47475010591866	0.610192811698807	0.56562336717336	0.528831700212322	0.641066280035238	0.707303248367224	0.704399186111886	0.699795402191076	0.705346460970617	0.618239166379264	0.624516798685022	0.602794552752265	0.589227469845131	0.563942641360629	0.575177564982514	0.661924806117232	0.630771312833688	0.576037046347317	0.537239482334715	0.538663466080787	0.582941338653408	0.538663466080787	0.463647609000806	0.306277369169669	0.527896747552734	0.675827633898682	0.701674123787604	0.641306714813426	0.655854551518442	0.647284848015653	0.634251710926165	0.597159356936288	0.603442459470354	0.530611470051512	0.438383479947663
59	0.622751032798775	0.611713451750168	0.672681158259707	0.549467244757627	0.531366285419146	0.667281336933204	0.689302039547387	0.573203309100855	0.740894982207175	0.570510447745185	0.57703894450333	0.605041803215686	0.468484506825262	0.197395559849881	0.447832396928932	0.611830086728625	0.651137459010189	0.632420213869156	0.693037062052332	0.678195731030306	0.675827633898682	0.659058035826409	0.738939588907394	0.684719203002283	0.687207268492992	0.615479708670387	0.632219646118989	0.605484472041284	0.594205636004995	0.555121167556787	0.607233119633162	0.523598775598299	0.517159656710324	0.581133411957722	0.602794552752265	0.529719324674337	0.558989866024985	0.478632959524503	0.643501108793284	0.785398163397448	0.874097965617633	0.69226801160917	0.723441983582154	0.644658126782026	0.622751032798775	0.58191060058307	0.594011798764924	0.549467244757627	0.515760957238309
60	0.726204872713315	0.720701654644714	0.720400439094382	0.607511906261278	0.611830086728625	0.68788189774925	0.721118683376736	0.593785898065522	0.688147488676563	0.546704902379127	0.599745637899126	0.627620288848268	0.553268195125482	0.34832946464127	0.361367123906708	0.535256138305424	0.630137246064564	0.58482376855917	0.615479708670387	0.672880655150033	0.675827633898682	0.660090556853591	0.68788189774925	0.594870220399163	0.608855526682534	0.588002603547568	0.566106370982696	0.575591471612526	0.563942641360629	0.590872750145419	0.597863716905518	0.489596662038267	0.429588319805625	0.550681518193389	0.531808096947568	0.469527328297663	0.420534335283965	0.523598775598299	0.626486311433508	0.693980594900994	0.752040089192336	0.601264216679128	0.651318361870889	0.553800782592772	0.726204872713315	0.700997922888745	0.705620850797914	0.63128407775347	0.600822134545315
61	0.705346460970617	0.662966236294638	0.620908677850087	0.659058035826409	0.638116203172301	0.724642705052608	0.718532368692478	0.670350583992318	0.777201074903641	0.481275373942343	0.701674123787604	0.50496801411559	0.559479220049725	0.427479133284893	0.166286455173105	0.527655167211147	0.649588013878863	0.684719203002283	0.711601110567932	0.702935280539462	0.709347692554057	0.711601110567932	0.630771312833688	0.570510447745185	0.493183126726669	0.661173271240812	0.65427058395952	0.615479708670387	0.640522312679424	0.647284848015653	0.627620288848268	0.586657762322532	0.554166601554124	0.586657762322532	0.532861868524515	0.543700168655046	0.361367123906708	0.472213685781505	0.653436739332555	0.615479708670387	0.752040089192336	0.615479708670387	0.6211708544323	0.555121167556787	0.705346460970617	0.63613206280501	0.632219646118989	0.675131532937032	0.638116203172301
62	0.770244328414355	0.759070209266663	0.731575268836038	0.762133956264704	0.699389032527472	0.756396396581206	0.777201074903641	0.74567384635488	0.747483049234191	0.719994415358595	0.67020869935941	0.587177236818606	0.607772458928329	0.622751032798775	0.511312855334557	0.18613118927678	0.68239850277138	0.642691855941703	0.529897390840558	0.591700642869322	0.631832431701086	0.628420237907826	0.491843433515377	0.442307258008812	0.461578275790515	0.558599315343563	0.527655167211147	0.548206406586996	0.56239136127598	0.601264216679128	0.722734247813416	0.633592097710771	0.626840007778175	0.717286468210327	0.63613206280501	0.63666254307827	0.317663192982261	0.6211708544323	0.678525634291574	0.306277369169669	0.574669379163798	0.493604895951975	0.485474700593773	0.463647609000806	0.770244328414355	0.748600248134863	0.742974398182001	0.785398163397448	0.690229984437248
63	0.857071947850131	0.828307958650396	0.769266332563325	0.802642961378288	0.684719203002283	0.785398163397448	0.814826916370989	0.729727656226966	0.644658126782026	0.652251154838357	0.7424883681445	0.602794552752265	0.5520154938738	0.604027390781464	0.420534335283965	0.158780214645761	0.481275373942343	0.563942641360629	0.679341508157834	0.673351617246763	0.701674123787604	0.717623239707485	0.559880567744499	0.433537909355837	0.367421904619802	0.558989866024985	0.629014802426676	0.523598775598299	0.563942641360629	0.739880774378741	0.713724378944766	0.552980357273746	0.627620288848268	0.69226801160917	0.665196055012819	0.563942641360629	0.225513405898131	0.5064446434135	0.659058035826409	0.37379217483451	0.755969410423908	0.540419500270584	0.555121167556787	0.538663466080787	0.857071947850131	0.75760607675699	0.752040089192336	0.837215003154813	0.684719203002283
64	0.792247692699178	0.792342831126593	0.758667875289752	0.779650910403478	0.746898593069036	0.765656192129967	0.781581332434859	0.756396396581206	0.76396302677433	0.701674123787604	0.719026948213309	0.642691855941703	0.680605820741535	0.633051836389749	0.559479220049725	0.342319108043368	0.660445706486571	0.625267392381302	0.430943201673913	0.507848905050807	0.536430873633501	0.521659181719982	0.438988088463722	0.378704402596406	0.427479133284893	0.533275936572776	0.477588176972773	0.537916147539001	0.537502323750922	0.511972688049476	0.701674123787604	0.657753560184238	0.634166643107734	0.728312197438615	0.678525634291574	0.661173271240812	0.463647609000806	0.668964074268407	0.647284848015653	0.210055739071239	0.463647609000806	0.420534335283965	0.413918321731503	0.330422647911483	0.792247692699178	0.792155125818682	0.789335211955095	0.802642961378288	0.738320086365564
65	0.788944292416609	0.803387655852124	0.757825135071937	0.748780072565636	0.720400439094382	0.771507487765551	0.789398206065344	0.77758534547108	0.75507655138169	0.724270393877557	0.68788189774925	0.668165367665155	0.678962334975182	0.669787423668774	0.672500999861026	0.485841908145075	0.68957456590974	0.633051836389749	0.292842771728575	0.420534335283965	0.438735863287364	0.42507932590842	0.537815398976105	0.484641109445205	0.523598775598299	0.466450719392852	0.423674925471873	0.479096089373137	0.446260532290659	0.493604895951975	0.600351668323255	0.615479708670387	0.654701413394248	0.692763872172872	0.704399186111886	0.661321623135883	0.576687027733489	0.650431765480747	0.661173271240812	0.463647609000806	0.499188877351038	0.569030896263964	0.549467244757627	0.549467244757627	0.788944292416609	0.816887506847437	0.805728968565243	0.760998236212117	0.711050416263667
66	0.793595251891256	0.764731121913201	0.76365217800239	0.734025774464651	0.686822678669862	0.722734247813416	0.750281581306785	0.767537222198409	0.718532368692478	0.721118683376736	0.675827633898682	0.657638838659042	0.626749469341379	0.68706434352727	0.681476968720775	0.543825413328204	0.734025774464651	0.669787423668774	0.123404466734786	0.490882678289311	0.523598775598299	0.509739678831507	0.598123219834409	0.585174396904325	0.605623800218161	0.357147277316123	0.337408000971623	0.377409869822617	0.34832946464127	0.391831024398899	0.615479708670387	0.611456289828471	0.632420213869156	0.738663476666902	0.769266332563325	0.650089300100656	0.624753868765043	0.621779298217878	0.661173271240812	0.463647609000806	0.523598775598299	0.627620288848268	0.572610951125847	0.575591471612526	0.793595251891256	0.789398206065344	0.780893597958103	0.746898593069036	0.676286798762985
67	0.555121167556787	0.652251154838357	0.644658126782026	0.387596686655181	0.655365927040252	0.624077252536407	0.579639740363704	0.710114027009105	0.606612611574693	0.640522312679424	0.606612611574693	0.63613206280501	0.546704902379127	0.593199776149629	0.579639740363704	0.463647609000806	0.848062078981481	0.785398163397448	0.273913280303404	0.571627801432262	0.634467808877101	0.633051836389749	0.5520154938738	0.582941338653408	0.504130041125521	0	0.261157410903024	0.244978663126864	0.270549762978573	0.313727886461595	0.713724378944766	0.523598775598299	0.361367123906708	0.739880774378741	0.523598775598299	0.675827633898682	0.701674123787604	0.684719203002283	0.615479708670387	0	0.387596686655181	0.596743147217574	0.393564135328064	0.252680255142079	0.555121167556787	0.579639740363704	0.63613206280501	0.481275373942343	0.625546089066075
68	0.803048888025466	0.699612047356218	0.734025774464651	0.726438087384824	0.672500999861026	0.737706833893344	0.785398163397448	0.807144148792506	0.726822712025215	0.701674123787604	0.671071212567907	0.633971119244455	0.631832431701086	0.676429493102036	0.661173271240812	0.550681518193389	0.697997221710601	0.702743746728771	0.289318067555653	0.558141896205864	0.558141896205864	0.57703894450333	0.662204267692794	0.649588013878863	0.655365927040252	0.222699286995737	0.234642480181151	0.252680255142079	0.201357920790331	0.244978663126864	0.595967376191495	0.572342310746425	0.625546089066075	0.739880774378741	0.718532368692478	0.624077252536407	0.569030896263964	0.604027390781464	0.676700867263609	0.463647609000806	0.722734247813416	0.649944576869654	0.643501108793284	0.633051836389749	0.803048888025466	0.749653438454688	0.692763872172872	0.726438087384824	0.657130214069605
69	0.778151532890489	0.724642705052608	0.785398163397448	0.744368525292303	0.663504694163281	0.770690159993482	0.808483287328421	0.839072621448383	0.769770619147701	0.739880774378741	0.684719203002283	0.63613206280501	0.640522312679424	0.6211708544323	0.673351617246763	0.579639740363704	0.699612047356218	0.700373599113589	0.344856576985306	0.631462729198422	0.631462729198422	0.620669593588488	0.702935280539462	0.693980594900994	0.681197260101575	0.239643502365002	0.283282165310539	0.299334026417771	0.118958533703202	0.261157410903024	0.604027390781464	0.546221781072819	0.6211708544323	0.691629139298642	0.718532368692478	0.531808096947568	0.615479708670387	0.534226044567914	0.76266305718895	0.5064446434135	0.640522312679424	0.678017239025013	0.665196055012819	0.634467808877101	0.778151532890489	0.755969410423908	0.704399186111886	0.744368525292303	0.663504694163281
70	0.762313039466475	0.671512768604101	0.744368525292303	0.69226801160917	0.684719203002283	0.754127782499203	0.8020679180281	0.813715185168691	0.742974398182001	0.684719203002283	0.663504694163281	0.607772458928329	0.647284848015653	0.633971119244455	0.656525006665568	0.519146114246523	0.673351617246763	0.694738276196703	0.331719717118712	0.551112029635411	0.569030896263964	0.558989866024985	0.665196055012819	0.638116203172301	0.649101053833886	0.306277369169669	0.17364501158219	0.17364501158219	0.252680255142079	0.37379217483451	0.615479708670387	0.538663466080787	0.621779298217878	0.69226801160917	0.668964074268407	0.599313896417285	0.629014802426676	0.575591471612526	0.721118683376736	0.5064446434135	0.713724378944766	0.634991925769138	0.645654934838247	0.582941338653408	0.762313039466475	0.73845422584369	0.674317172953673	0.69226801160917	0.684719203002283
71	0.807144148792506	0.792751369627871	0.761952071830807	0.766875408491402	0.762025165947073	0.796037264081438	0.789530441843347	0.852528799359837	0.812543279096054	0.797594494786276	0.789335211955095	0.74928429728463	0.759839588994952	0.704399186111886	0.718030340078631	0.628710843175721	0.826621319791806	0.770244328414355	0.504417620533909	0.0825724104766993	0.214027990799989	0.220752512735253	0.647959655695514	0.629014802426676	0.653625963841666	0.552980357273746	0.519404873973351	0.588002603547568	0.604724242621963	0.615479708670387	0.619317510626418	0.689058480895072	0.705513280405774	0.778731299184113	0.752040089192336	0.744066705077814	0.717623239707485	0.801529994231572	0.727894433777411	0.735314452816668	0.615479708670387	0.686936947022925	0.618374740261492	0.670350583992318	0.807144148792506	0.792541263516945	0.793463029225594	0.779225167074151	0.752664505457644
72	0.824500509364825	0.804782864076059	0.742241147645929	0.735314452816668	0.775193373310361	0.816186847758417	0.810832860332471	0.873573791707191	0.819322490592156	0.864677303716298	0.802642961378288	0.746898593069036	0.73845422584369	0.719994415358595	0.724642705052608	0.662105250373043	0.759745885765348	0.754766761483421	0.525868840758991	0.214849833075712	0.085854726725554	0.085854726725554	0.623678482664242	0.660090556853591	0.690229984437248	0.565758482271635	0.552421130216471	0.615479708670387	0.641306714813426	0.598123219834409	0.623229191077134	0.719994415358595	0.703638951304735	0.758357957590361	0.752040089192336	0.766525758027731	0.771883004162309	0.77662578352954	0.688009342030272	0.785398163397448	0.589985098109728	0.664663060990132	0.625003712953359	0.670350583992318	0.824500509364825	0.796849546162277	0.802945624890496	0.74786291785909	0.764984329306597
73	0.81526667084607	0.796510189206582	0.797796128030122	0.797594494786276	0.771377634488427	0.774448383073375	0.772791785813056	0.757383508039706	0.765708035165073	0.689058480895072	0.726204872713315	0.667281336933204	0.707303248367224	0.693483505944198	0.568515796032749	0.446636264062317	0.647284848015653	0.63613206280501	0.519279366044847	0.589227469845131	0.631832431701086	0.630771312833688	0.325136653327191	0.22801237345095	0.285584249282769	0.648396159052461	0.573203309100855	0.601264216679128	0.608016509944487	0.584373896848447	0.697997221710601	0.660445706486571	0.651623984477925	0.739880774378741	0.678525634291574	0.688297744913334	0.555121167556787	0.663504694163281	0.648784072127129	0	0.425271922584709	0.285293414562103	0.335704646624722	0.303442455338348	0.81526667084607	0.792751369627871	0.793731882581484	0.82201625422926	0.78072519817369
74	0.835481873978228	0.684719203002283	0.864677303716298	0.785398163397448	0.675827633898682	0.80921669470965	0.735314452816668	0.693980594900994	0.761579632085247	0.684719203002283	0.633051836389749	0.5064446434135	0.76365217800239	0.84106867056793	0.615479708670387	0.378228192334186	0.420534335283965	0.536061489866503	0.549467244757627	0.735314452816668	0.785398163397448	0.785398163397448	0.299334026417771	0.299334026417771	0.306277369169669	0.555121167556787	0.5064446434135	0.509739678831507	0.538663466080787	1.5707963267949	0.811726117528233	0.735314452816668	0.785398163397448	0.905600271782078	0.811726117528233	0.739880774378741	0.37379217483451	0.339836909454122	0.584373896848447	0	0.523598775598299	0.219987977395459	0.299334026417771	0.270549762978573	0.835481873978228	0.735314452816668	0.706119023078598	0.785398163397448	0.675827633898682
75	0.799161369292704	0.803583990977754	0.820079431585046	0.819671572319923	0.779515674753404	0.789902728836793	0.78054371820037	0.708168364155356	0.740695777433651	0.684719203002283	0.708168364155356	0.645006474211262	0.67741791405497	0.729727656226966	0.493183126726669	0.468057857325583	0.615479708670387	0.670760061790458	0.605891118839246	0.649814057550667	0.69048963272509	0.708519020239377	0.394646171326552	0	0.159451650607169	0.684719203002283	0.670350583992318	0.657130214069605	0.645006474211262	0.650431765480747	0.752040089192336	0.703638951304735	0.726822712025215	0.741223068763045	0.650431765480747	0.678195731030306	0.455533356978361	0.645273246179178	0.678017239025013	0.306277369169669	0.470960700649922	0.347977440013515	0.426887174546417	0.391831024398899	0.799161369292704	0.789902728836793	0.805403500574443	0.805951896811937	0.791280652041493
76	0.758111894320109	0.748327172280567	0.766875408491402	0.706119023078598	0.752040089192336	0.794489573439417	0.775193373310361	0.734288797579491	0.794832685497478	0.659058035826409	0.729727656226966	0.675827633898682	0.727577067139301	0.644658126782026	0.555121167556787	0.48600742513232	0.642432398786809	0.661924806117232	0.595694305833586	0.652251154838357	0.688297744913334	0.670350583992318	0.300684891226831	0.371938311296452	0.433537909355837	0.668964074268407	0.563942641360629	0.642432398786809	0.594521032025033	0.5064446434135	0.798913322632588	0.744813071053797	0.662544100468216	0.701674123787604	0.665196055012819	0.732105828588812	0.538663466080787	0.671512768604101	0.624753868765043	0.270549762978573	0.361367123906708	0.302745951623004	0.190125603346467	0	0.758111894320109	0.739880774378741	0.757081141626205	0.732668900697789	0.752040089192336
77	0.87970635648515	0.860483202748286	0.851966327173272	0.811050441029548	0.804633677101112	0.815719775413206	0.802642961378288	0.813868830604215	0.785398163397448	0.661924806117232	0.773000198764775	0.721393720255409	0.734924887983927	0.768541037550494	0.638116203172301	0.509739678831507	0.649588013878863	0.673951327925744	0.541460589627302	0.593199776149629	0.603442459470354	0.596307580810805	0.238787761113384	0.377698081518681	0.426238860886872	0.629014802426676	0.558989866024985	0.635264989529311	0.615479708670387	0.542639102249653	0.720510296919857	0.729727656226966	0.649588013878863	0.734586110971738	0.770244328414355	0.725622849280966	0.605891118839246	0.67741791405497	0.665196055012819	0.210055739071239	0.250032893098804	0.175868750092725	0.149628909359517	0.190125603346467	0.87970635648515	0.832342100951207	0.866105315097693	0.82389773372586	0.814260343193045
78	0.870920954328976	0.849402606539488	0.797304050377783	0.804883614697414	0.804390071667092	0.817334768342419	0.791016259140762	0.785398163397448	0.819515541308038	0.659058035826409	0.762133956264704	0.706951727887218	0.755380134174809	0.717286468210327	0.632219646118989	0.493604895951975	0.59209403498061	0.639665362289039	0.604386750944712	0.664663060990132	0.653436739332555	0.663130622978717	0.221060567043416	0.320096739563226	0.399325060228488	0.643501108793284	0.574260996577278	0.662966236294638	0.68192136938031	0.615479708670387	0.735314452816668	0.718937571222422	0.65086950648339	0.724642705052608	0.769266332563325	0.713724378944766	0.573203309100855	0.655365927040252	0.66608729774058	0.219987977395459	0.205568931161174	0.139123411367399	0.102240099484267	0.212412213739444	0.870920954328976	0.822273688570262	0.839721842842193	0.817888556165451	0.817064898663015
79	0.785398163397448	0.82389773372586	0.7424883681445	0.659058035826409	0.744813071053797	0.80921669470965	0.717623239707485	0.80921669470965	0.746898593069036	0.615479708670387	0.835481873978228	0.691089970309746	0.690229984437248	0.874097965617633	0.752040089192336	0.5520154938738	0.63613206280501	0.675827633898682	0.530969602742069	0.649588013878863	0.615479708670387	0.642432398786809	0.222699286995737	0.463647609000806	0.414457732322583	0.684719203002283	0.615479708670387	0.722734247813416	0.532861868524515	0.509739678831507	0.755969410423908	0.857071947850131	0.785398163397448	0.684719203002283	0.90183225252649	0.84106867056793	0.722734247813416	0.601264216679128	0.665196055012819	0.420534335283965	0.219987977395459	0.214849833075712	0.154922319870813	0.205568931161174	0.785398163397448	0.746898593069036	0.7424883681445	0.659058035826409	0.744813071053797
80	0.796510189206582	0.773769208039793	0.791727446353447	0.69744527931559	0.701674123787604	0.785398163397448	0.791280652041493	0.735314452816668	0.785398163397448	0.629014802426676	0.715550959254757	0.700373599113589	0.600822134545315	0.542639102249653	0.554166601554124	0.638116203172301	0.656525006665568	0.663954434454216	0.638116203172301	0.670760061790458	0.679967449413111	0.666297534519842	0.680228781781825	0.707303248367224	0.687368745363946	0.620063945418646	0.615479708670387	0.600020875509267	0.594205636004995	0.490882678289311	0.558141896205864	0.407826351695612	0.143347568905365	0.453292477481619	0.486694955074773	0.452314355672018	0.579639740363704	0.615479708670387	0.710651985054635	0.785398163397448	0.785398163397448	0.65086950648339	0.662204267692794	0.662544100468216	0.796510189206582	0.779650910403478	0.772576245327389	0.722734247813416	0.687552636964828
81	0.806237529608737	0.76365217800239	0.814149637847428	0.706119023078598	0.660733929949391	0.807144148792506	0.84233934562409	0.767321936893889	0.696034266019562	0.640522312679424	0.720510296919857	0.649944576869654	0.608461004393317	0.510374677637097	0.53682282645947	0.629839533948421	0.729727656226966	0.739880774378741	0.637413761717983	0.697997221710601	0.707303248367224	0.689058480895072	0.732105828588812	0.678195731030306	0.68957456590974	0.575591471612526	0.604558103643497	0.531366285419146	0.581133411957722	0.555121167556787	0.542639102249653	0.297670792409756	0.331430158168531	0.450865458074151	0.486694955074773	0.320096739563226	0.523598775598299	0.595124567552538	0.803259104596488	0.835481873978228	0.955316618124509	0.735314452816668	0.725732850993635	0.746898593069036	0.806237529608737	0.769266332563325	0.762133956264704	0.719417359567511	0.660733929949391
82	0.803048888025466	0.750486080905767	0.828662006090264	0.737379176425049	0.653090262750521	0.773769208039793	0.821142888340209	0.715550959254757	0.677828704285389	0.665196055012819	0.69516559319944	0.625995223288672	0.630771312833688	0.575591471612526	0.634991925769138	0.635432528518847	0.697997221710601	0.766406255127804	0.63128407775347	0.70862627212767	0.725732850993635	0.698758345188678	0.755969410423908	0.71040465888713	0.70862627212767	0.586890976639907	0.627620288848268	0.554166601554124	0.593199776149629	0.746898593069036	0.455533356978361	0.103881908102777	0.45396125157238	0.5064446434135	0.472213685781505	0.457521750518565	0.534226044567914	0.615479708670387	0.794832685497478	0.811726117528233	0.90183225252649	0.771883004162309	0.754514331385036	0.771110504762802	0.803048888025466	0.768153365416609	0.760387734994563	0.737379176425049	0.637078645262861
83	0.804390071667092	0.765912712097483	0.798913322632588	0.749134495254634	0.660928143635317	0.811726117528233	0.855067833776333	0.778151532890489	0.707620078546386	0.713724378944766	0.7424883681445	0.647284848015653	0.628052059141889	0.572342310746425	0.558989866024985	0.645006474211262	0.774286137588315	0.734025774464651	0.619892299352801	0.739880774378741	0.759070209266663	0.734025774464651	0.753731428131882	0.711963713633119	0.705346460970617	0.625133752413044	0.652251154838357	0.573203309100855	0.569030896263964	0.588002603547568	0.539493116114726	0.330422647911483	0.414457732322583	0.406895998199721	0.5064446434135	0.311814345520905	0.579639740363704	0.552980357273746	0.785398163397448	0.876815731893903	0.911738290968488	0.800106166801415	0.76426511129902	0.759070209266663	0.804390071667092	0.759745885765348	0.76484442998296	0.76365217800239	0.660928143635317
84	0.684719203002283	0.713724378944766	0.698758345188678	0.593199776149629	0.663504694163281	0.736935220377444	0.733581323640083	0.663504694163281	0.626486311433508	0.713724378944766	0.698758345188678	0.557598826699537	0.659058035826409	0.588002603547568	0.513585909631033	0.659058035826409	0.509739678831507	0.638116203172301	0.709347692554057	0.713724378944766	0.749653438454688	0.733581323640083	0.736935220377444	0.604027390781464	0.552980357273746	0.733581323640083	0.746898593069036	0.67741791405497	0.718532368692478	0.955316618124509	0.663504694163281	0.455533356978361	0.504130041125521	0.306277369169669	0	0.659058035826409	0.652251154838357	0.785398163397448	0.663504694163281	0.785398163397448	0.869122203007293	0.768153365416609	0.769266332563325	0.652251154838357	0.684719203002283	0.698758345188678	0.67741791405497	0.593199776149629	0.663504694163281
85	0.622135063910722	0.615479708670387	0.688641567142056	0.495181051695738	0.425271922584709	0.583529922875334	0.622533419750133	0.602072920261333	0.602072920261333	0.615479708670387	0.5064446434135	0.560499733185269	0.5064446434135	0.504130041125521	0.490882678289311	0.621779298217878	0.665196055012819	0.606612611574693	0.63613206280501	0.794489573439417	0.738158102087739	0.739880774378741	0.668964074268407	0.637413761717983	0.607772458928329	0.684719203002283	0.575591471612526	0.569030896263964	0.599313896417285	0.785398163397448	0.615479708670387	0.542639102249653	0.579639740363704	0.481275373942343	0.746898593069036	0.501093013265357	0.433537909355837	0.132843615738865	0.472213685781505	0.339836909454122	0.668964074268407	0.558989866024985	0.607772458928329	0.627620288848268	0.622135063910722	0.555121167556787	0.608663970108714	0.455533356978361	0.425271922584709
86	0.818756237602561	0.793595251891256	0.82246915451433	0.775193373310361	0.746898593069036	0.729727656226966	0.684719203002283	0.645654934838247	0.691629139298642	0.663504694163281	0.609370613742946	0.727577067139301	0.71594425292463	0.684719203002283	0.649588013878863	0.626486311433508	0.211617930749753	0.174969045665689	0.637078645262861	0.777201074903641	0.752040089192336	0.729727656226966	0.625995223288672	0.610192811698807	0.615479708670387	0.697997221710601	0.642432398786809	0.684719203002283	0.656525006665568	0.785398163397448	0.745355373380619	0.701674123787604	0.693037062052332	0.693980594900994	0.549467244757627	0.711357371793949	0.523598775598299	0.615479708670387	0.309935426887992	0.420534335283965	0.630771312833688	0.577723941815074	0.609370613742946	0.582941338653408	0.818756237602561	0.760798075934313	0.766875408491402	0.775193373310361	0.746898593069036
87	0.694738276196703	0.711357371793949	0.701674123787604	0.634991925769138	0.62827967096144	0.678017239025013	0.645654934838247	0.652251154838357	0.70882804145816	0.768153365416609	0.543984182024939	0.727577067139301	0.604558103643497	0.622533419750133	0.653436739332555	0.659058035826409	0.222699286995737	0.216522331255706	0.6211708544323	0.742974398182001	0.684719203002283	0.661173271240812	0.711357371793949	0.675131532937032	0.656868665011578	0.725253222200054	0.674740942223553	0.668964074268407	0.656525006665568	0.563942641360629	0.748327172280567	0.703210371382123	0.667281336933204	0.696698361177263	0.650431765480747	0.704399186111886	0.570510447745185	0.534226044567914	0.250686923123035	0.584373896848447	0.684719203002283	0.69226801160917	0.644184033085802	0.644658126782026	0.694738276196703	0.661173271240812	0.667646045037048	0.634991925769138	0.62827967096144
[truncated: 38 more columns]
